1 **Lived experiences of caregivers of persons with epilepsy**  
2 **attending an epilepsy clinic at a tertiary hospital, eastern**  
3 **Uganda: A phenomenological approach**

4 **Lindah Okiah<sup>1</sup>, Samuel Olowo<sup>1#a\*</sup>, Stanely J. Iramiot<sup>2</sup>, Rebecca Nekaka<sup>3</sup> and Lydia VN.**  
5 **Ssenyonga<sup>1</sup>**

6 <sup>1</sup>Department of Nursing, Busitema University Faculty of Health Sciences, Mbale, Uganda.

7 <sup>2</sup>Department of Microbiology and Immunology, Busitema University Faculty of Health  
8 Sciences, Mbale Uganda.

9 <sup>3</sup>Department of Community and Public Health, Busitema University Faculty of Health  
10 Sciences, Mbale Uganda.

11 <sup>#a</sup>Current Address: Department of Nursing, Mbarara University of Science and Technology,  
12 Mbarara, Uganda.

13

14 \*Corresponding author

15 E-mail: [samuel28olowo@gmail.com](mailto:samuel28olowo@gmail.com) (SO)

16

17

18

19

20

**NOTE: This preprint reports new research that has not been certified by peer review and should not be used to guide clinical practice.**

## 21 **Abstract**

22 **Introduction:** Epilepsy has been found to affect caregivers' quality of life, life style,  
23 psychological health, social well-being and their working time. Caregivers in Uganda as in the  
24 rest of the world are important in assisting a person with epilepsy in complying with medical  
25 directions and can be actively involved in communicating with health care professionals. Little  
26 is known about the lived experiences of caregivers of persons afflicted with epilepsy in Uganda.  
27 The purpose of the study was to determine the lived experiences of caregivers of persons with  
28 epilepsy attending the epilepsy clinic at Mbale regional referral hospital, eastern Uganda.

29 **Methods and materials:** Forty participants were selected for the study through  
30 purposive sampling. Face to face in-depth interviews with unstructured interview guide were  
31 conducted to gather participants' information. The investigator conceptualized the interview  
32 guide, reviewed by co-investigators, and revised and approved as the final data collection  
33 instrument after an extensive and comprehensive literature review. The interview guide  
34 comprised of two sections, the first section comprised of the questions that elicited the  
35 participants' social demographic information. The second section comprised questions that  
36 explored caregivers experiences of persons afflicted with epilepsy. Notations were taken and a  
37 digital recorder was used purposely for audio-recordings. All interviews lasted for an hour and  
38 were audio-recorded with the participants' consent. An inductive thematic analysis was  
39 employed and adopted to identify the patterns emerging from the texts.

40 **Results:** The caregivers majorly perceived epilepsy as a burden. Four main themes were  
41 revealed from the analysis and these are; psychological, social, economic, and physical  
42 burdens.

43 **Conclusion:** The caregivers majorly perceived epilepsy as a serious burden. This burden  
44 can be psychological, social, economic, and physical. Therefore, services and plans targeting  
45 patients with epilepsy need to consider the burden that caregivers encounter to  
46 comprehensively manage epilepsy and its resultant burden.

## 47 **Introduction**

48 Epilepsy remains a globally health challenge affecting all key health care players including  
49 caretakers [1]. The burden of refractory epilepsy is on the increase despite major  
50 pharmacologic advances in the management of epilepsy with over 22.5% of epileptic patients  
51 suffering from refractory epilepsy [1]. Studies have shown epilepsy to be common across the  
52 population, with devastating effects and increasing in prevalence rates [2]. The International  
53 League against epilepsy recognizes epilepsy as a chronic non-communicable disease and a  
54 significant public health challenge affecting over 70 million people worldwide [3]. Epilepsy  
55 accounted for 0.56% of the global burden of disease and therefore poses a major burden to the  
56 global health care community [4]. The disease burden from epilepsy has been reported to be  
57 higher in developing regions of the world [5]. According to a 2013 epidemiological report on  
58 sub-Saharan Africa, epilepsy was the fourth most common neurological condition among  
59 regions of Africa, with prevalence rates estimated to vary from 49 to 215 per 100,000 people  
60 [6]. The incidence of epilepsy has been reported to be high in Uganda with over 156 new cases  
61 of epilepsy per 100,000 people each year and an increasing prevalence of 13.3% [7]. Epilepsy  
62 affects everyone irrespective of race, culture, ethnicity, country, time and space [4].  
63 Epilepsy and its resultant burden directly affect relationships between the caregiver and the  
64 care receiver [8]. It has a significant implication for the individual affecting the quality of life  
65 and indirectly affects the caregivers in various life domains [1]. The burden of epilepsy does  
66 not only arises from seizure activities but other factors like social and cultural stigma affiliated

67 to epilepsy [9]. Social rejection of epilepsy victims, being barred form marriage and  
68 employment has also been associated with an increased burden of epilepsy in the community  
69 [10]. In East and South-central Africa, stigma from epilepsy has been associated with low  
70 school attendance, school attainment among children and increased inferiority complex among  
71 care givers in society [1]. Care giving and receiving for epilepsy can happen at any moment in  
72 life. “It involves a multidimensional role, varying from daily routine activities such as  
73 household management, checking and monitoring tasks, providing transportation and  
74 physical care to recognizing reportable symptoms” [11]. Care givers can further assist a  
75 person with epilepsy in complying with medical direction and can be actively involved in  
76 communicating with healthcare professionals [12]. The caregivers of persons with epilepsy  
77 experience severe emotional, physical, and economic burden resulting from the nature,  
78 chronicity, disability and stigma affiliated to epilepsy condition. Several studies globally have  
79 shown that substantial burden is impacted in various ways on caregivers who support  
80 individuals with epilepsy. While epilepsy is a common phenomenal in Uganda, there has been  
81 limited regional research done to study the lived experiences of care givers of persons with  
82 epilepsy. Moreover with reference to the Health Management and Information Systems,  
83 (HMIS) register at Mbale regional referral hospital psychiatric unit, the outpatient epileptic  
84 clinic enrolled a total number of 295 out of 831 new patients during the financial year July  
85 2016- June 2017, 124 of the 295 persons afflicted with epilepsy were male clients and 171 were  
86 female clients, a total of 206 clients who returned for follow-up treatment were normally  
87 accompanied by their care givers. However, information concerning lived experiences of care  
88 givers of persons with epilepsy was insufficient. Therefore, this study aimed to determine the  
89 lived experiences of care givers of persons with epilepsy attending the epilepsy clinic at Mbale  
90 regional referral hospital, eastern Uganda.

## 91 **Materials and methods**

### 92 **Study design**

93 This study employed a qualitative phenomenological approach. A Phenomenology is an  
94 approach to qualitative enquiry that focuses on lived experiences of persons [13]. Through  
95 using this approach the research gains a profound understanding of the phenomenon. It  
96 therefore generates a detailed view of human experience.

### 97 **Study site and study population**

98 The study was conducted at Mbale regional referral hospital Psychiatric Unit. Mbale regional  
99 referral hospital is located in Eastern Uganda approximately 214km East of Kampala, Uganda's  
100 capital [14]. Mbale regional referral hospital receives patients of all age groups children, men  
101 and women who come from all over the 15 districts of the eastern region of the country [15].  
102 It has a catchment population of 4 million, bed capacity of 511, bed occupancy averagely 359  
103 with 18 inpatient wards [15]. The hospital has over forty physician including intern doctors,  
104 over 170 nurses and students (both medical and nursing) [16]. The psychiatric unit has an  
105 inpatient and runs an outpatients epileptic clinic every Wednesday, patients attending this clinic  
106 usually come along with their caregivers. The psychiatric unit has no trained medical doctor  
107 working in the unit [17]. The psychiatric unit is majorly covered by psychiatric clinical officers  
108 who hold diploma in clinical medicine and with a psychiatry specialization and psychiatric  
109 nurses with diplomas and certificates in psychiatry specialization [17]. The study population  
110 comprised of 30 adult care givers of epileptic patients who attended the epileptic clinic at Mbale  
111 regional referral hospital and 10 health workers who attended to patients with epilepsy at the  
112 hospital during the study period. This gives a total population of 40 participants for the study.

### 113 **Eligibility criteria**

114 All accessible health workers and eligible caregivers who lived with the patients, were involved  
115 in monitoring treatment adherence and attended the follow up clinic with the patient were  
116 enrolled consecutively until the required sample size was obtained. Caregivers below 18 years,  
117 caregivers whose persons had other physical and mental disorders apart from epilepsy and  
118 those who refused to consent were excluded from the study.

## 119 **Sampling technique**

120 Purposive sampling was employed to select only caretakers of persons living with epilepsy.  
121 For the sample size, saturation sampling was employed. Using this approach, saturation was  
122 assumed when no new information emerged. Full saturation was reached on a sample of 30  
123 participants.

## 124 **Data collection**

125 Face- to- face in-depth interviews with an unstructured interview guide were conducted to  
126 gather participants' information. Unstructured interview [18] is a “conversation with a  
127 purpose” and enables researchers to obtain in-depth information. “It is also described as a  
128 shared experience in which researchers and interviewees come together to create a context of  
129 conversational intimacy in which participants feel comfortable telling their story”. The  
130 interview guide consisted of open-ended questions and follow-up probes to ensure a better  
131 understanding. The aim was to ascertain and explore lived experiences about care of a patient  
132 with epilepsy. The interview guide was pretested among caregivers attending the same clinic  
133 who consented to take part in the pilot study. Necessary adjustments were later done to ensure  
134 clarity. Results from the pilot survey were not considered during the final analysis. Before the  
135 interview began, verbal and written informed consent were obtained from the participants.  
136 Understanding was ensured among the prospective participant on the aims and scope of the  
137 study. The interview guide was conceptualized by the investigator, reviewed by co-

138 investigators, and revised and approved as the final data collection instrument. This was after  
139 a thorough literature review. Distractions during the interview process was avoided as much  
140 as possible by conducting the interviews in quiet secluded rooms. The quiet rooms were  
141 assumed to be a neutral setting and would encourage freedom of speech among the participants.  
142 The presence of a trained and experienced qualitative researcher was ensured during the  
143 interview. The experienced qualitative researcher also assisted in taking note of the non-verbal  
144 cues. The interview lasted between 40minutes to 1hour. All caregivers were interviewed in the  
145 language which they best understood which were English, Lugisu or Luganda. The key  
146 informants (health workers) were interviewed in English. During interview guide preparations,  
147 a fruitful discussion was ensured for those English words that had no direct translation in the  
148 local languages and suitable ways of conveying them to participants were reached. Saturation  
149 was reached when no new information was emerging among the participants. The interviewers  
150 pre-briefed, had frequent reviews and debriefed each other throughout the interviews cycle. All  
151 what ensured was the preserve the original meaning in the participants' perspective.

## 152 **Data analysis and presentation**

153 The collection and analysis of the data were done simultaneously. The In-depth interviews were  
154 audio recorded and later subjected to a careful verbatim transcription. An inductive thematic  
155 analysis was employed and adopted to identify the patterns emerging from the texts. Flexibility  
156 was ensured to variations while noting regularities, contradictions and emerging patterns  
157 among participants' views. A thorough reading and understanding of the transcripts was  
158 ensured to obtain an overall sense of the participants' lived experiences. Line coding of the  
159 statements was employed to discover how the participants experienced the phenomenon. A  
160 thorough review of the transcripts were ensured and later a list of codes were developed. During  
161 the comprehensive review of the transcripts, attention was paid to the differences and  
162 similarities. The generated codes were later merged to form themes. The analysis proceeded

163 till all the concepts were identified and the resultant categories were coherent and meaningful.  
164 Credibility was ensured by independent analysis of the data by the investigators and a trained  
165 and experienced qualitative researcher. On a later comparison of the analysis results, a high  
166 agreement was demonstrated. Conformability of the study is demonstrated by how the in  
167 empirical data is line with the study findings. Dependability was ensured by ensuring clarity in  
168 the research process. Data was presented narratively. The reporting of data was in accordance  
169 to consolidated criteria for reporting qualitative research (COREQ) guide lines [19].

## 170 **Ethical consideration**

171 The proposal was presented to Busitema University faculty of health science scientific  
172 committee. The study was later approved by Cure Children’s hospital of Uganda Research and  
173 Ethics Committee and the **REC number is: CCHU-REC/08/019**. Participation in the study  
174 was voluntary and an informed consent was sought from all eligible caregivers and key  
175 informants. Before data collection, participants were given a detailed explanation of what the  
176 study was about then they were given a consent form to sign. All participants’ information was  
177 handled confidentially, all data were limited to the investigators and no name but rather study  
178 numbers of participants was used during and after the study. The study was voluntary, refusal  
179 or withdrawal from the study was addressed by explaining to the participants that the study was  
180 for academic purposes and that all information provided would be kept confidential. During  
181 data collection and data analysis individuals’ rights and consent was sought and assured of  
182 confidentiality and anonymity.

## 183 **Results**

### 184 **Demographics of the caregivers**



185 Out of the thirty care givers that were interviewed, 16(53%) were females and 14(47%) of the  
186 participants were males. Majority, 20(67%) of the participants were married, 09(30%) were  
187 single and 01(3%) of the participants was divorced. With regards to education, majority,  
188 15(50%) of the participants never acquired formal education, 11(37%) acquired certificate  
189 level education, 03(10%) acquired diploma level in education and 01(3%) had degree-level  
190 education. With regards to tribes, majority, 20(67%) of the care givers were Bagishu, and the  
191 remaining 10(33%) of the participants were of different tribes. Professionally, 29(97%) of the  
192 participants comprised of security guards, farmers, students, businessmen and women, and  
193 01(3%) of the participants was a nurse. About 10(33%) of the participants were biological  
194 fathers, 3(10%) of the participants were sisters to the patient, 13(43%) of the participants were  
195 biological mothers, 1(3%) was a spouse and 02(7%) of the participants were caregivers. About  
196 13(43%) of the participants reported that their patients had epilepsy for more than 5 years,  
197 08(27%) fell in the range between three to five years, 08(27%) of the participants fell in the  
198 range between one to two years and 10(3%) of the participants reported that their participants  
199 had suffered from epilepsy for less than a year.

## 200 **Burden of epilepsy**

201 The caregivers perceived epilepsy as a major burden affecting different aspects of their lives:  
202 psychosocial, economic and physical aspect of their lives. This has been presented narratively  
203 below:

### 204 **Psychological Burden**

205 This is a situation where a caregiver was assessed with a tendency to get their stable mind,  
206 which is perceived as a threatening or excessive uneasiness. Psychological burden was  
207 discussed under; effects of caring for persons afflicted with epilepsy in day to day life,

208 interference with personal relationship with others, time for one's self, feelings after separation  
209 from the patients and behavioral influence.

### 210 **Effects of caring for persons afflicted with epilepsy in day to day life**

211 Psychological burden was expressed differently among care givers, concern about the future  
212 lives of their persons was conceptualized among the participants:

213 *"I... worry a lot that this child will die any time, I think a lot because all the time she gets sick*  
214 *even right now we are hospitalized here but when we are discharged I know she is going to get*  
215 *an attack at any time that makes me worry, my husband used to help me but when he realized*  
216 *that this disease cannot be cured he does not give me any help. I am the mother as well as the*  
217 *father to this child that disturbs me; I wish God could heal my daughter..."* [Care giver no.7].

218 *"I... don't know how my daughter will be in future; I wonder whether she will be fine..."*  
219 [Care giver no.12]

### 220 **Effects of caring for a person afflicted with epilepsy on personal relationship**

221 Feelings of being looked down upon or belittled for taking care of their loved one was  
222 expressed by the participants:

223 *"... Some people fear me and they isolate themselves from me, some of them fear my son and*  
224 *think that he will infect their children nowadays I restrict him from moving to the neighbors'*  
225 *homes, we stay in our home..."* [Care giver no.4].

226 However, some participants admitted that they were being well cared for:

227 *"...Mmmh ...we talk well with my friends and neighbors, there are some days when he gets an*  
228 *attack when I am not around but my friends and neighbors who like me come around and help*  
229 *me..."* [Care giver no. 17].

### 230 **Effect of caregiving on individual's time**

231 Caregivers acknowledged that their time is really affected taking care of their loved ones:

232 “...Really I don’t have enough time because I have some other things that I would like to do  
233 but because of caring for the patient I feel that the time is not enough, as you know with business  
234 when you are not there you end up losing customers and making losses...”[Care giver no.25].

235 “...I have enough time but when I go somewhere I make sure that I come back quickly because  
236 I know that any time my daughter can get the attack...” [Care giver no.2].

### 237 **Feelings after separation from their persons**

238 Care givers had mixed feelings while they were separated from their loved ones; experiences  
239 of bad feelings when separated because of the close affection that they had developed with  
240 their person unfolded:

241 “...It affects me, I feel bad because I didn’t want him to be the way he is. You know....in our  
242 hearts we are not the same there are good and bad people, I fear if I leave him behind he may  
243 be mistreated...” [Care giver no.13].

244 However, a sense of hopefulness had not left others in that all was well while they were away  
245 from their persons:

246 “...I leave him with my daughter in-law she is good and she takes good care of him just like  
247 me...” [Caregiver no.4].

248 Others expressed no worries at all because they had trust in God and the antiepileptic  
249 medication that they were using.

### 250 **Behavioral influence associated with care giving**

251 This included positive or negative attitudes that the care givers developed while caring for their  
252 persons, a sense of good behavior still persisted among the participants. This was majorly  
253 affiliated to proper understanding of the patient’s condition resulting from past experience with  
254 the same patient:

255 “...Since I understand her condition, and I know that no one calls for a disease my behaviors  
256 have never changed in fact I treat her with a lot of care as a delicate person...” [Care giver  
257 no.30].

258 Some behavioral changes surfaced among the participants:

259 “...For me normally my mood changes when he becomes resistant to what I feel he should do,  
260 I get annoyed with him there are times when he is supposed to return to the Hospital for review  
261 and he seems to have given up I use force to bring him to the hospital because when I talk softly  
262 to him he is never co-operative...” [Care giver no. 16].

### 263 **Social Burden**

264 This was measured basing on the understanding linked to outcomes such as; effects of epilepsy  
265 on public relationship, opinions about unpredictable epileptic attacks, feelings of stigma,  
266 alternative care givers in case of absence and effects of caregiving to persons living with  
267 epilepsy in a family:

#### 268 **Effect of caring for a person afflicted with epilepsy on public relationship**

269 Feelings of bad public relations emerged among the participants:

270 “...That is so shameful I feel sorry because if she is in a public place and she makes noise, she  
271 begins fidgeting and eventually she falls down. Upon recovering ,she gets up with a lot of  
272 energy like a mad woman and urinates on herself when this happens many people laugh at me  
273 and run away.... you just have to be strong ...” [Care giver no.7].

274 However, an intact public relations still persisted among some participants:

275 “...When she falls in a public place, some people run away, but those who know about this  
276 disease come and help me...” [Care giver no.8]

#### 277 **Opinion about the unpredictable epileptic attacks**

278 The participants were interviewed to seek their opinion about the unpredictable epileptic  
279 attacks. Concern about the situation stood out among the participants:

280 *“I don’t feel okay because I am not prepared for these attacks, I feel a lot of pain!.... if there*  
281 *were some signs showing me that my patient is going to get an attack I would make her sit or*  
282 *lie down in a safer place before it occurs so that she does not get injured....”* [Caregiver  
283 no.11].

284 *“...Obviously those attacks scare me utmost, it mainly scares me when I struggle to do what I*  
285 *am supposed to do and after doing it you see the thing coming again, at times I also feel stressed*  
286 *I ask myself if by now I am around and I am here what if she is alone in the room and it so*  
287 *happens that it comes then what could have happened...”* [Care giver no.14].

288 However, some expressed no feelings of worries because they were used to the situation.

### 289 **Feelings of stigma**

290 The participants were assessed on the basis of stigma that’s caused while caring for their loved  
291 ones. Experiences of discrimination in society while caring for their loved ones emerged among  
292 the participants:

293 *“...Ok.....some people chase him and tell him to come back home ,some say that he will infect*  
294 *their children, I make sure that I restrict his movement, he stays at home ,he eats ,bathes ,plays*  
295 *and sleeps thereafter...”* [Care giver no.4].

296 However, life remained normal among some participants:

297 *“...Me I don’t mind about peoples words I just help him as a brother some people tend to*  
298 *isolate him but me I can’t, run away from him because they say blood is thicker than water I*  
299 *know the truth about this disease ,I also believe that one day God will heal him...”* [Care giver  
300 no.20].

### 301 **Alternative care givers in case absence**

302 This situation was assessed on the basis of the care givers opinion in relationship to their  
303 absence from their persons in unavoidable circumstances. Fear of unknowns during their  
304 absence persisted among the participants:

305 “ ...*When I am not at home at least there has to be somebody who is close to him, I make sure*  
306 *that my phone is on so that I am notified if his condition changes, there I can call people who*  
307 *can help me to take him to the hospital...*” [Care giver no.20].

308 “...*When I get a problem, I first take care of her, I prepare food for her and then I go away.*  
309 *When I am supposed to spend a night away from home, I excuse myself and tell them that I*  
310 *have a patient at home , and there is no one left behind to help her, so I get back home quickly*  
311 *and take care of my daughter...*”[Care giver no.8].

312 However, some caregivers expressed no worry because they have good substitute caregivers  
313 when they are away from home.

#### 314 **Effects of caring for persons afflicted with patients in a family**

315 Sometimes families get affected while caring for their loved ones; however some families may  
316 not be affected with the situation. Negative effects expressed as ‘unsettledness’ on their  
317 families as a result of caring for their loved ones emanated among the participants:

318 “...*Men leave me because I can’t be there with them, when we want to have some good time*  
319 *together that’s when the child’s condition gets worse; in fact my daughter’s illness has made*  
320 *me fail to settle in marriage. All the men I get run away from me once they realize that she is*  
321 *suffering from that disease...*” [Care giver no.7].

322 “...*For sure we feel desperate, we have tried our level best but things are not working out...*”  
323 [Care giver no.20].

324 However, some of the caregivers expressed no effect on their family.

## 325 **Economic Burden**

326 This was defined in terms of the cost incurred towards medical care. Care givers are more likely  
327 to have economic burden. This was assessed basing on some of the factors such as; family  
328 economic interference, other challenges faced while caring for persons afflicted with epilepsy,  
329 effects of caring for a person afflicted with epilepsy on production at work, and the effects of  
330 care giving on financial stability:

### 331 **Interference with the care givers source of income**

332 Economic burden can affect both the patient and the care givers' quality of life and access to  
333 medical care. These effects can be measured in a positive and negative way depending on  
334 severity of the disease. A significant impact on income sources was expressed emotionally by  
335 the participants:

336 “...*There is less time to attend to business, no hope for employment opportunity due to stigma.*  
337 *At times when I get a job I end up losing it because of my brother's sickness, I absentee myself*  
338 *from work to look after him, my income is just affected like that...*” [Care giver no. 25].

339 “...*Caring for my daughter really affects me , I don't work especially when she is sick, she*  
340 *needs much attention and when I don't work being a tailor ,I don't get money, my customers*  
341 *get annoyed with me when their clothes are not ready, they quarrel at me and I end up losing*  
342 *many of them...*” [Care giver no.3].

### 343 **Effects of caring for persons afflicted with epilepsy on production at work**

344 Many care givers find it a rewarding task to look after their beloved ones, however for some  
345 people being a care giver has got a negative impact on their daily production at work. Different  
346 degrees of worries about productivity at work surfaced among the participants:

347 “...My productivity at work is partially affected, because the patient takes 50% of my time and  
348 I spend the other half for doing my work, I don’t give my best to my work and my family suffers  
349 the consequence...” [Care giver no.30].

350 “...I have less time to attend to my business, I have lost customers and my earnings have  
351 reduced...” [Care giver no.16].

### 352 **Effects of caring for a person afflicted with epilepsy on financial stability**

353 Depending on the severity of epilepsy, there may be other health needs which may be so costly.  
354 Financial instability was expressed by the participants in the most extreme form that is fears of  
355 potential resultant poverty:

356 “... Since I am spending much of my time caring for the patient with a chronic illness, I may  
357 end up becoming poor because I am not working but spending daily and I may remain without  
358 anything...” [Care giver no.18].

359 “...If I spend much of my time caring for the patient, I will become poor because all I have will  
360 go to the patients feeding, transport, and drugs...” [Care giver no. 10].

### 361 **Physical Burden**

362 Physical burden constitutes the area of; physical burden to caring for a person afflicted with  
363 epilepsy, physical challenges that may affect the health of care givers, inconveniences  
364 associated with caring for persons afflicted with epilepsy at night and inconveniences of  
365 feeding one’s self while caring for a person afflicted with epilepsy:

### 366 **Physical burden associated with caring for persons afflicted with epilepsy**

367 According to the participants, some reported that it was difficult to care for their persons  
368 afflicted with epilepsy. Feelings of uneasiness during the care of the patients was expressed by  
369 the participants:



370 “...it is a little bit hard because an epileptic patient is not like any other patient when he  
371 develops an attack, you have to make sure that he doesn’t get an injury of which sometimes he  
372 has much energy and after he has developed the attack he gets sleepy, and confused so I have  
373 to carry him to the hospital it is a little hard but I just have to endure and move on...” [Care  
374 giver no.2].

375 “...It is difficult because it’s a chronic illness that will take the rest of someone’s time so  
376 someone has to have enough time...” [Care giver no.22].

### 377 **Physical challenges that may affect the health of care givers for persons afflicted with** 378 **epilepsy care**

379 The physical burden faced by the care givers were based on the respondent’s opinion, some of  
380 the participants had challenges associated with giving care to their patients because they had  
381 to carry their patients to a safer place after a fit, they had to monitor their movement, and some  
382 of them had difficulties with feeding, especially after their persons fell:

383 “.....Yes at times I have to carry him and he is heavy, in this process I end up feeling chest  
384 pain, backache I really become tired especially when he collapses it is a big burden to me...”  
385 [Care giver no.25].

386 “Yaah!.... the headache is there because all the time I am thinking sometimes I feel as if I am  
387 getting ulcers...” [Care giver no.16].

388 However, others reported that they were comfortable with the situation.

### 389 **Inconveniences caused by caring for persons afflicted with epilepsy at night**

390 Night inconveniences described as ‘disrupted sleep’ and ‘no sleep’ evolved among the  
391 participants:

392 “ ...The attacks mostly come at night, I have to wake up in the night and struggle to rush him  
393 to the hospital it is very frustrating especially when the attack comes in the midst of the night I  
394 feel like I am trapped and helpless...” [Care giver no 20].

395 “My mind is ever pre-occupied with thoughts, I hardly get sleep it is worse when dates for  
396 review come and I don’t have money, since they also say that the disease is genetic I sometimes  
397 think that it may show up in other family member I just imagine how I will handle the situation  
398 if it so happens ...” [Care giver no. 16].

### 399 **Burden of feeding while caring for a person afflicted with epilepsy**

400 The burden here was not so often, this depended on the frequency of the attack and the severity  
401 of the disease. When the attack was frequent, the care givers feeding habits got affected and  
402 vice versa:

403 “...The way someone behaves makes you lose appetite for they can bring for you food but you  
404 can’t eat when she is in an attack...” [Care giver no.22].

405 “...When she is attacked, I first wait for her to stabilize that is when I eat food if she does not  
406 stabilize my interest for food goes away...” [Care giver no. 24].

407 However, others never lost appetite for food during the attack because they were used to the  
408 situation.

## 409 **Key informants**

### 410 **Findings**

411 About 10 key informants were interviewed, 05(50%) of the participants were females and  
412 05(50%) of the participants were male, 07(70%) of them were married whereas 03(30%) of the  
413 participants were single. With regards to education 07(70%) of the participants had attained  
414 Diploma-level education, 01(10%) of the participants was a degree holders, 01(10%) was a  
415 certificate holders and 1(10%) of the participants had studied up to senior four. Majority of the  
416 participants were of different tribes 6(60%), whereas 2(20%) of the participants were Itesot and  
417 about 02(20%) of the participants were Bagishu. Majority of the participants were Psychiatric  
418 nurses 06(60%), about 02(20%) of the participants were psychiatric clinical officers, 01(10%)

419 of the participants was a counselor and 01(10%) of the participants was a peer support worker.

420 Seven themes emerged out of the interviews that were carried out with the key informants.

#### 421 **Perception of the way care givers felt while taking care of their persons**

422 Some of the participants thought that the care givers felt bewitched, cursed, and unfortunate.

423 Some thought that the care givers developed bad feelings and they ended up giving up on the

424 caregiving role and others thought that the care givers felt that health workers were

425 knowledgeable and could therefore give them good advice and treatment:

426 “...I think they are stressed, they are also stigmatized because people have many beliefs about

427 epilepsy in the community some people think that the patient got the disease because the family

428 sinned or is cursed. These things lead to stress or stigma in the lives and families of the care

429 givers...” [Key informant no.5].

430 They also thought that the care givers felt that it was their obligation to care for their persons:

431 “...For them what they feel is that they have to be there for the client to ensure that they get

432 the right drugs, at the right time, in the right dose, they also give a report about the patients

433 progress to the health workers.....” [Key informant no.7].

#### 434 **Institutional programs that dealt with the stress related effects of the care givers**

435 Some of the participants acknowledged that the institution employed psychologists, psychiatric

436 clinical officers, counselors, social workers, and psychiatric nurses among others who gave

437 continuous health education. They counseled and encouraged caregivers not to give up on their

438 role, some admitted that they had community outreach programs and radio talk shows where

439 they sensitized the public about epilepsy, and one participant reported that they linked up the

440 needy patient who come to the facility without care givers to the social workers for support:

441 “...We have outreach programs whereby we go out to the people with epilepsy in the

442 community and talk to them about how they should take their medication ,we tell them that

443 epilepsy is a chronic illness and we encourage the care givers to support their persons, we also

444 *have radio programs whereby we go on air and talk about epilepsy and clear peoples*  
445 *misconceptions about this disease , we answer their questions and tell them about the services*  
446 *that are offered here at the hospital and we discourage them from seeking help from the*  
447 *traditional healers....” [Key informant no.5].*

#### 448 **Role of health workers in caring for caregivers**

449 Some of the participants reported that their role is to counsel patients, give health education  
450 talks, encourage drug compliance, protect the patients and their caregivers and encourage the  
451 care givers to continuously take care of their persons:

452 *“....My role is to teach them how to manage these patients , I tell them about the danger areas*  
453 *that they that they should protect their patients from like fire places, water bodies, or broken*  
454 *bottles because these things can cause harm to the patient...” [Key informant no.2].*

455 *“.....My role is to help these care givers to appreciate that epilepsy is a life long illness and it*  
456 *is just like any other disease so taking care of a patient with this illness is just like taking care*  
457 *of a patient with any other illness. They have to appreciate that these fits can be controlled*  
458 *though it takes long and someone has to be on drugs throughout their life....” [Key informant*  
459 *no. 6].*

#### 460 **Resources available in taking care of the epileptic patients and their care givers**

461 Some of the participants reported that antiepileptic drugs were available, some said that the  
462 institution employed, trained health workers and others said that they received support from  
463 some non-government organizations, they had good security, and beds for the patients’ use:

464 *“.....We have specialized personnel, drugs are available and the mental health unit is fully*  
465 *functional it provides services to the patients 24 hours in a day.....” [Key informant no.3].*

466 *“.....We have antiepileptic drugs, patients provide meals for themselves but if there is one who*  
467 *does not have a relative, JENGA (A Christian based Non –Government-Organization) helps*  
468 *them to buy drugs, they provide food for them and at times they give the patients clothes. We*

469 *also have social workers who take care of the patients who come to the hospital without their*  
470 *relatives....” [Key informant no.1].*

#### 471 **Effects of caring for persons afflicted with epilepsy on family/social relationships**

472 Some of the participants reported that they thought that families of the caregivers were  
473 stigmatized in the communities, and others thought that the care givers wasted resources, and  
474 lost their jobs and social network as well:

475 “.....*I think that family relationships can be affected due to stigma, other people say that this*  
476 *thing is contagious they even fear to share personal effects, for instance if it is a child who is*  
477 *sick, the neighbors fear and stop their children from playing together with him or her. In my*  
478 *village I used to observe people serve these patients food on banana leaves they would refuse*  
479 *to use their plates thinking that this thing is contagious, this patients at times get irritable and*  
480 *if it is a man he can chase away the wife so their relatives can be disgusted with them...*” [Key  
481 informant no.1].

482 “.....*Resources are wasted, money is wasted in caring for them, time is wasted in caring for*  
483 *them and they are stigmatized and think that the disease is contagious...*” [Key informant no.3].

#### 484 **Symptoms that care givers get as a result of caring for their loved ones**

485 Some of the key informants reported that they thought that care givers got fatigued and the  
486 others thought that they presented with symptoms of stress, such as headache, worry, chest  
487 pain, and backache and sleep disruption:

488 “.....*Sometimes they get fatigued because when the patients have a fit they can bite them when*  
489 *they are unconscious, they can also beat them because they become so energetic and in the*  
490 *process of restraining them they become tired...*” [Key informant no.6].

491 “....*I think they can develop headache, because of thinking so much about the patient’s*  
492 *condition that has no cure, also they can have disrupted sleep patterns because epilepsy attacks*  
493 *come even at night and interfere with their sleep...*” [Key respondent no.10].

## 494 **Effects of care giving role on care givers personal well being**

495 Some of the participants reported that they thought that the caregivers would end up becoming  
496 poor, and some reported that they thought that the caregivers experience social, physical and  
497 psychological burdens which manifested in form of productivity loss at work, loss of social  
498 network, loss of appetite for food, and disrupted sleep among others:

499 “...Most of them end up becoming poor because they are confused, people deceive them that  
500 traditional healers can solve their problem so they spend a lot of money and by the time they  
501 come to the hospital the patient’s condition may have deteriorated and they may not afford to  
502 buy the drugs that are needed to manage this severe form of epilepsy because they are very  
503 expensive....” [Key informant no.1].

504 “.....Because of stress they are ever thinking about how the patient will be at the end, they end  
505 up being lonely, psychologically tortured and live in segregation...” [Key informant no. 2].

## 506 **Discussions**

507 Epilepsy is a condition that is treatable but potentially devastating especially in low resource  
508 setting where access to treatment is not readily available [20]. Epilepsy does not only affect  
509 the primary bearer but also the caregivers [21]. This study therefore was to determine the lived  
510 experiences of care givers of persons with epilepsy attending the epilepsy clinic at Mbale  
511 regional referral hospital, eastern Uganda. The caregivers perceived epilepsy as a major burden  
512 interfering with different aspects of their lives.

513 Different psychological burdens surfaced among the caregivers. Worries about day-to-day  
514 living and future life of their persons was expressed by the participants and, disrupted or no  
515 sleep. The finding has been reported in other studies: a study in the United States [22] found  
516 that caregiving to patients with epilepsy adversely affects the caregiver’s psychological health  
517 with many caregivers reporting anxiety, depression and insomnia after becoming caregivers.

518 These findings is also similar with the findings of Settineri and friends [23] which showed that  
519 care givers rise in the level of anxiety. Studies in Nigeria [20] also found high levels of  
520 emotional distress among caregivers of patients with epilepsy. Caregivers find themselves in  
521 constant alertness situation; they mention being in a state of hyper vigilance and being anxious.  
522 These findings were also in line with the findings of other related studies [8, 24]. Psychological  
523 interventions therefore need to be targeted at care givers of people living with epilepsy.  
524 A number of social burdens in the forms of stigma and discrimination were experienced by the  
525 caregivers; disrupted public relationship, feelings of shame, being under looked or despised  
526 because of caring or their persons afflicted with epilepsy emerged. Related studies in United  
527 States [25] reported stigma among caregivers of patients with intractable epilepsy. These study  
528 findings are in line with the findings of other studies [23, 26-28] where different social  
529 consequences of epilepsy on the caregivers were reported. Many of these social consequences  
530 remain among the unmet needs in epilepsy and therefore further significantly contributes to the  
531 burden of epilepsy among the population [29].  
532 This study showed that care givers of persons afflicted with epilepsy had more economic  
533 burden since they had to spend most their time caring for their persons this impacted negatively  
534 in their daily functioning. This finding was in line with that of other studies [30] which showed  
535 that epilepsy was noted to have significant economic implications in terms of health care needs,  
536 premature death and lost work productivity. This study revealed that caring for persons  
537 afflicted with epilepsy had a negative impact on their earnings as most of the time care givers  
538 had to be close to their persons than to their business, this was in line with the findings of other  
539 studies [1] which revealed that house hold members spend time and resources supporting the  
540 epileptic or paying for disability related costs increases the likelihood of the caregiver  
541 becoming poor. This study finding further agreed with the findings of [31] which showed that  
542 caregivers gave account of spending money to care , losing some days of work for care giving,

543 and travelling to seek care for relatives. Absenteeism was associated with care givers leading  
544 to loss of jobs in some instances. High costs resulting from care of persons with epilepsy which  
545 occur either directly or indirectly has been reported in other related studies [22, 31, 32]. It's  
546 therefore important to consider the economic component when understanding the burden of  
547 epilepsy.

548 This study found out that caregivers experience various physical burden; fatigue, chest pain  
549 and headache. This finding agree with the findings of other related studies [10] which showed  
550 that family care giver symptoms such as, fatigue, headaches, joint and muscle pains. Related  
551 studies in the United States [22] also found physical burdens like heads as quite commonly  
552 experienced by the care givers. Patients with frequent seizures was mentioned to more likely  
553 to be of higher burden to the caregivers. This is due to the fact that they require energy to carry  
554 them from places of attack to safer places. This has been reported in other studies elsewhere  
555 [22].

556 Majority of the key informants reported that they administer treatment to the patients, they  
557 offer counseling services to patients, and they give continuous health education talks at the  
558 facility and conduct radio talk shows. However, findings from the central part of Uganda  
559 among the epilepsy patients at Mulago national referral hospital found limited patient-health  
560 worker interaction [33]. They admitted having enough stocks of antiepileptic drugs and an  
561 adequate number of staff, they also reported that some of the patients and their caregivers were  
562 receiving support from the social workers and some Non-Governmental Organizations.  
563 Majority of the key informants believed that caregivers are stigmatized in the communities,  
564 some of them reported that the care givers wasted resources (money and time) while caring for  
565 their persons and had lost their jobs and social network. They also thought that caregivers got  
566 symptoms like fatigue, stress, headache and sleep disruptions these findings matched with the  
567 findings of most of the studies done in other parts of the world [26, 27].



## 568 **Conclusion**

569 This study looked at the lived experiences of care givers of persons afflicted with epilepsy  
570 attending the epilepsy clinic at Mbale regional referral hospital and revealed that care givers.  
571 The caregivers majorly describe epilepsy as a major burden affecting different aspects of their  
572 lives. Therefore, findings of this study revealed that the care givers of persons afflicted with  
573 epilepsy experience psychological, social, economic, and physical burdens as they make efforts  
574 to care for their loved ones.

## 575 **Recommendations**

576 The health care providers should continue targeting care givers of persons afflicted with  
577 epilepsy in their service provision to ensure that their state of health is not adversely affected.  
578 Services and plans targeting patients with epilepsy need to put into consideration the burden  
579 that caregivers encounter in order to comprehensively manage epilepsy and its resultant burden.

## 580 **Declarations**

### 581 **Ethical approval and consent to participate**

582 This study was approved by Cure Children's hospital of Uganda Research and Ethics  
583 Committee and the RCE number is: CCHU-REC/08/019. Participation in the study was  
584 voluntary and an informed consent was sought from all eligible caregivers and key informants.

### 585 **Consent for publication**

586 Not applicable.

### 587 **Availability of data and materials**

588 Data from this study will be made available by the corresponding authors on a reasonable  
589 request.

## 590 **Funding**

591 No funding was received towards this study however the researchers do acknowledge support  
592 Busitema University Directorate of Graduate Studies, Research and Innovation (DGSRI) for  
593 small grants programs that facilitated the writing of this manuscript.

## 594 **Acknowledgement**

595 We are grateful to the study participants.

## 596 **Authors' contributions**

597 LO, SO and LVS conceptualized the study; LO, SO, LVS, IJS, RN, formal analysis and  
598 interpretation of the data; LO, SO, LVS and IJS wrote the original manuscript draft; LO, SO,  
599 LVS, IJS and RN performed review and editing of the manuscript draft. All authors read and  
600 approved the final manuscript.

## 601 **References**

- 602 1. Karakis I, Cole AJ, Montouris GD, San Luciano M, Meador KJ, Piperidou C. Caregiver  
603 burden in epilepsy: determinants and impact. *Epilepsy research and treatment*. 2014;2014.
- 604 2. Lua PL, Nor-Khaira-Wahida K, Zariah AA, Lee KF. Caregiving for epilepsy:  
605 awareness, knowledge, attitude and health-related quality of life of family caregivers.  
606 *Malaysian Journal of Psychiatry*. 2014;23(1):45-56.
- 607 3. Singh A, Trevick S. The Epidemiology of Global Epilepsy. *Neurologic clinics*.  
608 2016;34(4):837-47.
- 609 4. Beghi E, Giussani G, Nichols E, Abd-Allah F, Abdela J, Abdelalim A, et al. Global,  
610 regional, and national burden of epilepsy, 1990–2016: a systematic analysis for the Global  
611 Burden of Disease Study 2016. *The Lancet Neurology*. 2019;18(4):357-75.
- 612 5. Oluwole LO, Obadeji A, Dada UM. Burden of stigma among relatives of Nigerian  
613 patients living with epilepsy. *Journal of Health Research and Reviews*. 2015;2(2):61.

- 614 6. Boling W, Means M, Fletcher A. Quality of life and stigma in epilepsy, perspectives  
615 from selected regions of Asia and Sub-Saharan Africa. *Brain sciences*. 2018;8(4):59.
- 616 7. Kaddumukasa M, Mugenyi L, Kaddumukasa MN, Ddumba E, Devereaux M, Furlan A,  
617 et al. Prevalence and incidence of neurological disorders among adult Ugandans in rural and  
618 urban Mukono district; a cross-sectional study. *BMC neurology*. 2016;16(1):1-9.
- 619 8. Saburi G. Stressors of caregivers of school-age children with epilepsy and use of  
620 community resources. *Journal of Neuroscience Nursing*. 2011;43(3):E1-E12.
- 621 9. Karim N, Ali A, Deuri SP. Care burden in epilepsy: A study from northeast India. *Int J*  
622 *Res Dev Health*. 2014;2(3):84-9.
- 623 10. Senthil M, Kiran M. Family interaction pattern among caregivers of patients with  
624 epilepsy and alcohol dependence. *IOSR Journal of humanities and social science (IOSR-*  
625 *JHSS)*. 2015;20(9):01-9.
- 626 11. Anjum W. SCHIZOPHRENIA AND EPILEPSY. *The Professional Medical Journal*.  
627 2017;24(05):757-66.
- 628 12. Jabor HA, Mohammed SH. Caregivers Knowledge about Psychosocial Problems of  
629 Epileptic Patients in AL-Diwanyia Governorate. *Indian Journal of Forensic Medicine &*  
630 *Toxicology*. 2019;13(2).
- 631 13. Khan SN. Qualitative research method-phenomenology. *Asian Social Science*.  
632 2014;10(21):298.
- 633 14. Musaba MW, Barageine JK, Ndeezi G, Wandabwa JN, Weeks A. Effect of preoperative  
634 bicarbonate infusion on maternal and perinatal outcomes of obstructed labour in Mbale  
635 Regional Referral Hospital: a study protocol for a randomised controlled trial. *BMJ open*.  
636 2019;9(4):e026675.

- 637 15. Namujju J, Muhindo R, Mselle LT, Waiswa P, Nankumbi J, Muwanguzi P. Childbirth  
638 experiences and their derived meaning: a qualitative study among postnatal mothers in Mbale  
639 regional referral hospital, Uganda. *Reproductive health*. 2018;15(1):1-11.
- 640 16. Saito H, Inoue K, Ditai J, Wanume B, Abeso J, Balyejussa J, et al. Alcohol-based hand  
641 rub and incidence of healthcare associated infections in a rural regional referral and teaching  
642 hospital in Uganda ('WardGel' study). *Antimicrobial Resistance & Infection Control*.  
643 2017;6(1):1-12.
- 644 17. Skylstad V, Akol A, Ndeezi G, Nalugya J, Moland KM, Tumwine JK, et al. Child  
645 mental illness and the help-seeking process: a qualitative study among parents in a Ugandan  
646 community. *Child and adolescent psychiatry and mental health*. 2019;13(1):1-13.
- 647 18. Jamshed S. Qualitative research method-interviewing and observation. *Journal of Basic  
648 and Clinical Pharmacy*. 2014;5(4):87-8.
- 649 19. Tong A, Sainsbury P, Craig J. Consolidated criteria for reporting qualitative research  
650 (COREQ): a 32-item checklist for interviews and focus groups. *International journal for quality  
651 in health care*. 2007;19(6):349-57.
- 652 20. Yusuf AJ, Nuhu FT, Olisah VO. Emotional distress among caregivers of patients with  
653 epilepsy in Katsina State, Northern Nigeria. *African Journal of Psychiatry*. 2013;16(1):41-4.
- 654 21. Poochikian-Sarkissian S, Sidani S, Wennberg R, Devins GM. Seizure freedom reduces  
655 illness intrusiveness and improves quality of life in epilepsy. *Canadian journal of neurological  
656 sciences*. 2008;35(3):280-6.
- 657 22. Hussain SA, Ortendahl JD, Bentley TGK, Harmon AL, Gupta S, Begley CE, et al. The  
658 economic burden of caregiving in epilepsy: An estimate based on a survey of US caregivers.  
659 *Epilepsia*. 2020;61(2):319-29.

- 660 23. Settineri S, Rizzo A, Liotta M, Mento C. Caregiver's burden and quality of life: caring  
661 for physical and mental illness. *International Journal of Psychological Research*. 2014;7(1):30-  
662 9.
- 663 24. Truong QT. The quality of life and caregiving burden among caregivers of people with  
664 dementia in Hanoi, Bac Ninh and Hai Phong, Vietnam. 2015.
- 665 25. Hansen B, Szaflarski M, Bebin EM, Szaflarski JP. Affiliate stigma and caregiver  
666 burden in intractable epilepsy. *Epilepsy & Behavior*. 2018;85:1-6.
- 667 26. Oshodi YO, Adeyemi JD, Aina OF, Suleiman TF, Erinfolami AR, Umeh C. Burden  
668 and psychological effects: caregiver experiences in a psychiatric outpatient unit in Lagos,  
669 Nigeria. *African journal of psychiatry*. 2012;15(2):99-105.
- 670 27. Thompson R, Kerr M, Glynn M, Linehan C. Caring for a family member with  
671 intellectual disability and epilepsy: practical, social and emotional perspectives. *Seizure*.  
672 2014;23(10):856-63.
- 673 28. Murugupillai R, Wanigasinghe J, Muniyandi R, Arambepola C. Parental concerns  
674 towards children and adolescents with epilepsy in Sri Lanka—Qualitative study. *Seizure*.  
675 2016;34:6-11.
- 676 29. Beghi E. Addressing the burden of epilepsy: Many unmet needs. *Pharmacological*  
677 *research*. 2016;107:79-84.
- 678 30. Mahrer-Imhof R, Jaggi S, Bonomo A, Hediger H, Eggenschwiler P, Krämer G, et al.  
679 Quality of life in adult patients with epilepsy and their family members. *Seizure*.  
680 2013;22(2):128-35.
- 681 31. Addo R, Agyemang SA, Tozan Y, Nonvignon J. Economic burden of caregiving for  
682 persons with severe mental illness in sub-Saharan Africa: A systematic review. *PloS one*.  
683 2018;13(8):e0199830.

- 684 32. Penovich PE, Buelow J, Steinberg K, Sirven J, Wheless J. Burden of seizure clusters  
685 on patients with epilepsy and caregivers. *The neurologist*. 2017;22(6):207-14.
- 686 33. Kaddumukasa M, Nalubwama H, Kaddumukasa MN, Lhatoo S, Sewankambo N,  
687 Katabira E, et al. Barriers to epilepsy care in Central Uganda, a qualitative interview and focus  
688 group study involving PLWE and their caregivers. *BMC neurology*. 2019;19(1):1-10.
- 689
